# Supplementary material for: Genome Reduction and Secondary Metabolism of the Marine Sponge-Associated Cyanobacterium Leptothoe
Source: MDPI journal article supplement (doi:10.3390/md19060298), 2021-05-24
Supplement: s1 [file s1]

# Genome Reduction and Secondary Metabolism of the Marine Sponge-Associated Cyanobacterium *Leptothoe*

Despoina Konstantinou <sup>1</sup>, Rafael V. Popin <sup>2</sup>, David P. Fewer <sup>2</sup>, Kaarina Sivonen <sup>2</sup>, and Spyros Gkelis <sup>1,\*</sup>

<sup>1</sup> Department of Botany, School of Biology, Aristotle University of Thessaloniki, Thessaloniki GR-541 24, Greece

<sup>2</sup> Department of Microbiology, University of Helsinki, Viikinkaari 9, FI-00014 Helsinki, Finland

\* Correspondence: sgkelis@bio.auth.gr; Tel.: +30-2310-998083

## Table of Contents

**Table S1.** Number of genes in subsystems (obtained by RAST server and SEED tool) per *Leptothoe* strain.

**Table S2.** Biosynthetic gene clusters per *Leptothoe* genome (antiSMASH results)

**Table S3.** Compounds produced by *Leptothoe* cyanobacteria extracted from the CyanoMetDB (Jones et al., 2020).

**Figure S1.** Circular view of the genomes of two sponge-associated *Leptothoe* species, generated with CGview (Stothard and Wishart, 2005). Circles from interior to exterior represent GC content and GC skew. Blue circles denote the coding sequences on forward and reverse strands.

**Figure S2.** Average amino acid identity heatmap of *Leptothoe* genomes.

**Figure S3.** Distribution of the categories of functional genes present in seven *Leptothoe* strains based on the Cluster of Orthologous Groups (COGs) of proteins. The alphabetic code for the COG categories is as follows: C, energy production and conversion; D, cell cycle control, cell division, chromosome partitioning; E, amino acid transport and metabolism; F, nucleotide transport and metabolism; G, carbohydrate transport and metabolism; H, coenzyme transport and metabolism; I, lipid transport and metabolism; J, translation, ribosomal structure, and biogenesis; K, transcription; L, replication, recombination, and repair; M, cell wall/membrane/envelope biogenesis; N, cell motility; O, posttranslational modification, protein turnover, chaperones; P, inorganic ion transport and metabolism; Q, secondary metabolite biosynthesis, transport, and catabolism; R, general function prediction only; S, function unknown; T, signal transduction mechanisms; U, intracellular trafficking, secretion, and vesicular transport; V, defense mechanisms.

**Table S1.** Number of genes in subsystems (obtained by RAST server and SEED tool) per *Leptothoe* strain.

| No. of genes in subsystems                                   | TAU-MAC<br>1615 | TAU-MAC<br>1115 | PCC 7375 | Heron Island<br>J | CCMR0081 | CCMR0082 | SIO3F4 |
|--------------------------------------------------------------|-----------------|-----------------|----------|-------------------|----------|----------|--------|
| Cofactors, Vitamins, Prosthetic Groups, Pigments             | 73              | 68              | 207      | 183               | 199      | 212      | 203    |
| Biotin                                                       | 6               | 7               | 12       | 13                | 11       | 11       | 22     |
| Thiamin biosynthesis                                         | 4               | 5               | 8        | 8                 | 8        | 8        | 18     |
| Menaquinone and Phylloquinone Biosynthesis                   | 0               | 8               | 14       | 6                 | 14       | 14       | 6      |
| Bilin Biosynthesis                                           | 8               | 0               | 13       | 9                 | 16       | 15       | 12     |
| Cobalamin synthesis                                          | 5               | 0               | 11       | 8                 | 11       | 11       | 17     |
| Chlorophyll Degradation                                      | 1               | 0               | 0        | 1                 | 0        | 0        | 1      |
| Heme and Siroheme Biosynthesis                               | 0               | 8               | 18       | 17                | 18       | 21       | 18     |
| Coenzyme B12 biosynthesis                                    | 0               | 0               | 18       | 11                | 15       | 17       | 0      |
| Riboflavin, FMN, FAD                                         | 7               | 7               | 15       | 15                | 7        | 14       | 19     |
| Pyridoxin (Vitamin B6) Biosynthesis                          | 0               | 0               | 7        | 9                 | 7        | 8        | 9      |
| NAD and NADP                                                 | 11              | 9               | 15       | 15                | 14       | 14       | 19     |
| Folate and pterines                                          | 24              | 15              | 61       | 53                | 55       | 64       | 47     |
| Lipoic acid metabolism                                       | 2               | 2               | 2        | 2                 | 2        | 2        | 2      |
| Coenzyme F420 synthesis                                      | 2               | 0               | 2        | 2                 | 2        | 2        | 2      |
| Coenzyme A Biosynthesis                                      | 3               | 5               | 11       | 14                | 12       | 11       | 11     |
| Cell Wall and Capsule                                        | 24              | 31              | 32       | 38                | 43       | 47       | 63     |
| Capsular and extracellular polysaccharides                   | 14              | 23              | 11       | 20                | 25       | 25       | 19     |
| Gram-Negative cell wall components                           | 5               | 0               | 0        | 0                 | 0        | 0        | 20     |
| Recycling of Peptidoglycan Amino Acids                       | 4               | 2               | 6        | 5                 | 7        | 7        | 4      |
| Murein Hydrolases                                            | 0               | 5               | 8        | 5                 | 7        | 9        | 10     |
| UDP-N-acetylmuramate from Fructose-6-phosphate Biosynthesis  | 0               | 0               | 0        | 6                 | 5        | 5        | 6      |
| Gram-Positive cell wall components                           | 1               | 1               | 2        | 2                 | 1        | 1        | 2      |
| Virulence, Disease and Defense                               | 21              | 22              | 44       | 48                | 45       | 41       | 51     |
| Resistance to antibiotics and toxic compounds                | 17              | 12              | 32       | 37                | 32       | 28       | 37     |
| Bacteriocins, ribosomally synthesized antibacterial peptides | 0               | 0               | 2        | 10                | 0        | 0        | 0      |
| Invasion and intracellular resistance                        | 4               | 10              | 10       | 11                | 13       | 13       | 14     |
| Potassium metabolism                                         | 7               | 11              | 14       | 17                | 16       | 15       | 18     |
| Potassium homeostasis                                        | 7               | 11              | 14       | 17                | 16       | 15       | 18     |

|                                                           |    |    |     |     |     |     |     |
|-----------------------------------------------------------|----|----|-----|-----|-----|-----|-----|
| Miscellaneous                                             | 10 | 3  | 17  | 18  | 17  | 17  | 17  |
| Phages, Prophages, Transposable elements, Plasmids        | 1  | 1  | 8   | 5   | 6   | 8   | 4   |
| Membrane Transport                                        | 33 | 16 | 49  | 63  | 52  | 48  | 58  |
| ABC transporters                                          | 0  | 0  | 3   | 6   | 63  | 4   | 5   |
| Protein translocation across cytoplasmic membrane         | 3  | 3  | 2   | 3   | 3   | 3   | 3   |
| Cation transporters                                       | 4  | 3  | 8   | 5   | 5   | 5   | 4   |
| NhaA, NhaD and Sodium-dependent phosphate transporters    | 0  | 1  | 2   | 2   | 1   | 1   | 2   |
| ECF class transporters                                    | 0  | 0  | 0   | 8   | 0   | 0   | 0   |
| Ton and Tol transport systems                             | 10 | 6  | 13  | 19  | 14  | 16  | 2   |
| TRAP transporters                                         | 3  | 3  | 3   | 4   | 4   | 3   | 4   |
| Protein and nucleoprotein secretion system, Type IV pilus | 13 | 0  | 17  | 16  | 18  | 16  | 21  |
| Iron acquisition and metabolism                           | 1  | 0  | 10  | 8   | 10  | 10  | 8   |
| RNA Metabolism                                            | 26 | 23 | 52  | 60  | 54  | 49  | 65  |
| RNA processing and modification                           | 12 | 5  | 25  | 25  | 26  | 24  | 28  |
| Transcription                                             | 13 | 16 | 23  | 23  | 21  | 20  | 34  |
| Group II intron-associated genes                          | 1  | 2  | 4   | 12  | 7   | 5   | 3   |
| Nucleosides and Nucleotides                               | 20 | 25 | 70  | 67  | 70  | 65  | 104 |
| Pyrimidines                                               | 0  | 0  | 13  | 15  | 16  | 15  | 37  |
| Purines                                                   | 11 | 12 | 38  | 39  | 35  | 34  | 43  |
| Ribonucleotide reduction                                  | 2  | 2  | 3   | 3   | 3   | 3   | 6   |
| Hydantoin metabolism                                      | 4  | 4  | 9   | 3   | 10  | 7   | 9   |
| Detoxification                                            | 3  | 7  | 7   | 7   | 6   | 6   | 9   |
| Protein Metabolism                                        | 73 | 80 | 188 | 178 | 176 | 179 | 188 |
| Protein folding                                           | 9  | 8  | 12  | 12  | 10  | 10  | 15  |
| Selenoproteins                                            | 2  | 2  | 2   | 5   | 2   | 2   | 6   |
| Protein biosynthesis                                      | 23 | 43 | 115 | 107 | 112 | 112 | 116 |
| Protein processing and modification                       | 25 | 20 | 27  | 24  | 24  | 26  | 25  |
| Protein degradation                                       | 14 | 7  | 32  | 30  | 28  | 29  | 26  |
| Cell Division and Cell Cycle                              | 0  | 4  | 33  | 26  | 30  | 30  | 54  |
| Motility and Chemotaxis                                   | 0  | 5  | 0   | 0   | 0   | 0   | 0   |
| Bacterial Chemotaxis                                      | 0  | 5  | 0   | 0   | 0   | 0   | 0   |

|                                                         |    |    |     |    |    |    |     |
|---------------------------------------------------------|----|----|-----|----|----|----|-----|
| Regulation and Cell signaling                           | 23 | 34 | 49  | 43 | 50 | 46 | 44  |
| cAMP signaling in bacteria                              | 16 | 22 | 36  | 25 | 40 | 35 | 34  |
| LysR-family proteins in Salmonella enterica Typhimurium | 0  | 0  | 0   | 1  | 0  | 1  | 0   |
| LysR-family proteins in Escherichia coli                | 0  | 0  | 0   | 1  | 0  | 1  | 0   |
| DNA-binding regulatory proteins, strays                 | 1  | 1  | 0   | 2  | 1  | 0  | 0   |
| Stringent Response, (p)ppGpp metabolism                 | 2  | 2  | 2   | 2  | 2  | 2  | 2   |
| Programmed Cell Death and Toxin-antitoxin Systems       | 4  | 9  | 11  | 12 | 7  | 7  |     |
| DNA Metabolism                                          | 32 | 59 | 127 | 85 | 97 | 96 | 106 |
| DNA repair                                              | 15 | 24 | 62  | 51 | 53 | 53 | 81  |
| DNA replication                                         | 4  | 2  | 4   | 4  | 4  | 4  | 5   |
| DNA recombination                                       | 0  | 0  | 0   | 0  | 0  | 0  | 0   |
| CRISPs                                                  | 0  | 7  | 24  | 11 | 19 | 13 | 7   |
| DNA uptake, competence                                  | 2  | 2  | 2   | 2  | 3  | 2  | 2   |
| Type I Restriction-Modification                         | 4  | 10 | 12  | 4  | 5  | 9  | 2   |
| Restriction-Modification System                         | 4  | 10 | 12  | 4  | 5  | 9  | 2   |
| DNA ligases                                             | 1  | 0  | 1   | 1  | 0  | 0  | 1   |
| DNA phosphorothioation                                  | 0  | 0  | 3   | 2  | 2  | 2  | 0   |
| DNA structural proteins, bacterial                      | 2  | 4  | 7   | 6  | 6  | 4  | 6   |
| Fatty Acids, Lipids, and Isoprenoids                    | 12 | 1  | 54  | 32 | 54 | 59 | 61  |
| Triacylglycerols                                        | 2  | 0  | 4   | 2  | 4  | 4  | 0   |
| Phospholipids                                           | 0  | 0  | 20  | 0  | 18 | 20 | 0   |
| Fatty acids                                             | 0  | 0  | 13  | 13 | 15 | 3  | 20  |
| Isoprenoids                                             | 10 | 1  | 17  | 17 | 17 | 17 | 4   |
| Nitrogen Metabolism                                     | 13 | 16 | 23  | 21 | 23 | 23 | 25  |
| Cyanate hydrolysis                                      | 5  | 5  | 6   | 6  | 6  | 6  | 6   |
| Ammonia assimilation                                    | 8  | 11 | 17  | 15 | 17 | 17 | 19  |
| Respiration                                             | 29 | 36 | 113 | 75 | 82 | 78 | 59  |
| Biotin                                                  | 6  | 7  | 15  | 15 | 14 | 14 | 22  |
| ATP synthases                                           | 9  | 9  | 13  | 12 | 10 | 10 | 0   |
| Electron accepting reactions                            | 3  | 3  | 50  | 14 | 21 | 16 | 18  |
| Electron donating reactions                             | 5  | 8  | 8   | 15 | 15 | 16 | 12  |
| Cytochrome B6-F complex                                 | 0  | 5  | 8   | 9  | 8  | 8  | 6   |

|                                                                |            |            |            |            |            |            |            |
|----------------------------------------------------------------|------------|------------|------------|------------|------------|------------|------------|
| Soluble cytochromes and functionally related electron carriers | 10         | 11         | 18         | 19         | 19         | 20         | 18         |
| Quinone oxidoreductase family                                  | 0          | 0          | 0          | 0          | 1          | 0          | 0          |
| Biogenesis of cytochrome c oxidases                            | 0          | 0          | 0          | 1          | 2          | 3          | 2          |
| Biogenesis of c-type cytochromes                               | 2          | 0          | 3          | 3          | 3          | 2          | 3          |
| <b>Stress Response</b>                                         | <b>22</b>  | <b>61</b>  | <b>84</b>  | <b>80</b>  | <b>90</b>  | <b>90</b>  | <b>115</b> |
| Oxidative stress                                               | 17         | 33         | 53         | 51         | 57         | 56         | 73         |
| Osmotic stress                                                 | 0          | 1          | 0          | 0          | 0          | 0          | 5          |
| Detoxification                                                 | 5          | 9          | 9          | 9          | 9          | 9          | 12         |
| SigmaB stress response regulation                              |            | 7          | 10         | 12         | 10         | 10         | 11         |
| Bacterial hemoglobins                                          |            | 15         | 15         | 11         | 15         | 16         | 22         |
| Commensurate regulon activation                                | 0          | 0          | 0          | 0          | 1          | 1          | 0          |
| Periplasmic Stress                                             | 3          | 3          | 15         | 4          | 4          | 4          | 1          |
| <b>Amino Acids and Derivatives</b>                             | <b>117</b> | <b>112</b> | <b>257</b> | <b>247</b> | <b>259</b> | <b>265</b> | <b>328</b> |
| Glutamine, Glutamate, Aspartate and Asparagine Biosynthesis    | 8          | 12         | 23         | 21         | 24         | 23         | 24         |
| Glutamate dehydrogenases                                       | 1          | 0          | 1          | 1          | 1          | 1          | 2          |
| Glutamine synthetases                                          | 2          | 2          | 3          | 1          | 3          | 3          | 6          |
| Histidine Biosynthesis                                         | 8          | 0          | 12         | 12         | 12         | 3          | 12         |
| Arginine; urea cycle, polyamines                               | 37         | 10         | 43         | 38         | 45         | 13         | 65         |
| S-methylmethionine                                             | 0          | 0          | 1          | 1          | 1          | 1          | 1          |
| Methionine Biosynthesis                                        | 0          | 0          | 22         | 23         | 22         | 23         | 23         |
| Threonine and Homoserine Biosynthesis                          | 7          | 9          | 12         | 11         | 12         | 12         | 12         |
| Methionine Salvage                                             |            | 3          | 0          | 0          | 0          | 0          | 0          |
| Threonine degradation                                          |            | 1          | 3          | 2          | 1          | 2          | 1          |
| Lysine Biosynthesis DAP Pathway                                | 0          | 0          | 9          | 9          | 8          | 9          | 11         |
| Cysteine Biosynthesis                                          | 7          | 6          | 12         | 13         | 12         | 12         | 12         |
| Creatine and Creatinine Degradation                            | 4          | 5          | 7          | 5          | 9          | 8          | 9          |
| Branched-Chain Amino Acid Biosynthesis                         | 0          | 0          | 16         | 15         | 16         | 17         | 16         |
| Leucine Biosynthesis                                           | 4          | 5          | 8          | 7          | 8          | 9          | 9          |
| Aromatic amino acids and derivatives                           | 26         | 34         | 35         | 40         | 36         | 37         | 43         |
| Proline and 4-hydroxyproline                                   | 0          | 0          | 7          | 7          | 8          | 7          | 11         |
| Alanine, serine, and glycine Biosynthesis                      | 13         | 23         | 34         | 32         | 33         | 37         | 52         |
| <b>Sulfur Metabolism</b>                                       | <b>0</b>   | <b>7</b>   | <b>18</b>  | <b>19</b>  | <b>19</b>  | <b>21</b>  | <b>20</b>  |
| <b>Phosphorus Metabolism</b>                                   | <b>19</b>  | <b>20</b>  | <b>33</b>  | <b>40</b>  | <b>40</b>  | <b>38</b>  | <b>53</b>  |

|                                                                |    |    |     |     |     |     |     |
|----------------------------------------------------------------|----|----|-----|-----|-----|-----|-----|
| High affinity phosphate transporter and control of PHO regulon | 3  | 3  | 6   | 12  | 9   | 9   | 8   |
| Phosphate metabolism                                           | 12 | 13 | 22  | 23  | 26  | 24  | 36  |
| Polyphosphate                                                  | 4  | 4  | 5   | 5   | 5   | 5   | 9   |
| Carbohydrates                                                  | 71 | 73 | 197 | 177 | 184 | 181 | 241 |
| Central carbohydrate metabolism                                | 10 | 12 | 99  | 80  | 91  | 86  | 124 |
| Aminosugars                                                    | 2  | 2  | 3   | 3   | 3   | 3   | 3   |
| Di- and oligosaccharides                                       | 5  | 9  | 14  | 11  | 12  | 14  | 10  |
| One-carbon Metabolism                                          | 4  | 4  | 5   | 5   | 5   | 5   | 4   |
| Organic acids                                                  | 3  | 0  | 0   | 0   | 0   | 0   | 0   |
| Fermentation                                                   | 2  | 5  | 23  | 18  | 21  | 19  | 28  |
| CO <sub>2</sub> fixation                                       | 29 | 20 | 27  | 32  | 25  | 28  | 44  |
| Sugar alcohols                                                 | 3  | 3  | 5   | 6   | 6   | 5   | 6   |
| Polysaccharides                                                | 6  | 10 | 11  | 11  | 11  | 11  | 11  |
| Monosaccharides                                                | 7  | 8  | 10  | 11  | 10  | 10  | 10  |

**Table S2.** Biosynthetic gene clusters per *Leptothoe* genome (antiSMASH results)

| Strain                                   | Number of genes |           |           |          |          |             |               |           |             |               |               |          | Total |
|------------------------------------------|-----------------|-----------|-----------|----------|----------|-------------|---------------|-----------|-------------|---------------|---------------|----------|-------|
|                                          | NR PS           | NRPS-like | T1P KS    | T3P KS   | PKS-like | Bacteriocin | Lasso-peptide | Terpene   | Cyanobactin | Ar-ylpoly-ene | Lanthipeptide | LAP      |       |
| <i>Le. spongia</i> TAU-MAC 1615          | 0               | 1         | 0         | 0        | 0        | 0           | 0             | 1         | 0           | 1             | 0             | 0        | 3     |
| <i>Le. kymatousa</i> TAU-MAC 1115        | 1               | 1         | 2         | 0        | 0        | 3           | 2             | 1         | 0           | 0             | 1             | 0        | 11    |
| Leptolyngbyaceae cyanobacterium CCMR0081 | 9               | 3         | 7         | 1        | 1        | 4           | 2             | 2         | 2           | 1             | 0             | 1        | 33    |
| Leptolyngbyaceae cyanobacterium CCMR0082 | 5               | 2         | 5         | 2        | 2        | 5           | 2             | 2         | 2           | 1             | 0             | 1        | 29    |
| <i>Leptolyngbya</i> sp. SIO3F4           | 3               | 2         | 3         | 1        | 0        | 2           | 0             | 3         | 0           | 1             | 0             | 0        | 15    |
| <i>Leptolyngbya</i> sp. PCC 7375         | 2               | 3         | 0         | 1        | 0        | 2           | 1             | 2         | 1           | 1             | 0             | 0        | 13    |
| <i>Leptolyngbya</i> sp. Heron Island J   | 4               | 3         | 3         | 0        | 0        | 1           | 2             | 3         | 0           | 1             | 0             | 0        | 17    |
| <b>Total</b>                             | <b>24</b>       | <b>15</b> | <b>20</b> | <b>5</b> | <b>3</b> | <b>17</b>   | <b>9</b>      | <b>14</b> | <b>5</b>    | <b>6</b>      | <b>1</b>      | <b>2</b> |       |

**Table S3.** Compounds produced by *Leptothoe* cyanobacteria extracted from the CyanoMetDB (Jones et al., 2020).

| Compound name                   | Class of compound         | Strain                                | Reference             | DOI                                                                                                       |
|---------------------------------|---------------------------|---------------------------------------|-----------------------|-----------------------------------------------------------------------------------------------------------|
| Grassypeptolide E               | other cyclic depsipeptide | <i>Leptolyngbya</i> sp. RSO3          | Thornburg et al. 2011 | <a href="https://doi.org/10.1021/np200270d">https://doi.org/10.1021/np200270d</a>                         |
| Grassypeptolide D               | other cyclic depsipeptide |                                       |                       |                                                                                                           |
| Ibu-epidemethox-lyngbyastatin 3 | other cyclic depsipeptide | <i>Phormidium ectocarpi</i> SAG 60.90 | Papendorf et al. 1998 | <a href="https://doi.org/10.1016/S0031-9422(98)00440-3">https://doi.org/10.1016/S0031-9422(98)00440-3</a> |
| Dolastatin 12                   | other cyclic depsipeptide |                                       |                       |                                                                                                           |
| Hierridin B                     | other linear non-peptide  | <i>Phormidium persicinum</i>          | Chapman et al. 1967   | <a href="https://doi.org/10.1021/ja00999a058">https://doi.org/10.1021/ja00999a058</a>                     |
| Phycoerythrobilin               | other linear non-peptide  |                                       |                       |                                                                                                           |

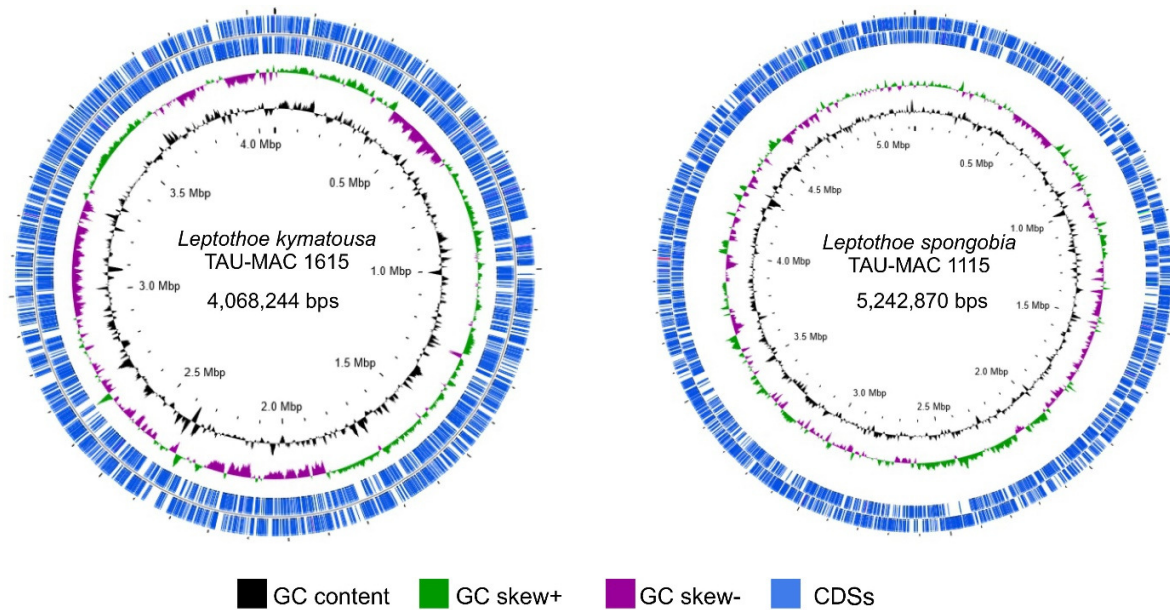

**Figure S1.** Circular view of the genomes of two sponge-associated *Leptothoe* species, generated with CGview (Stothard and Wishart, 2005). Circles from interior to exterior represent GC content and GC skew. Blue circles denote the coding sequences on forward and reverse strands.

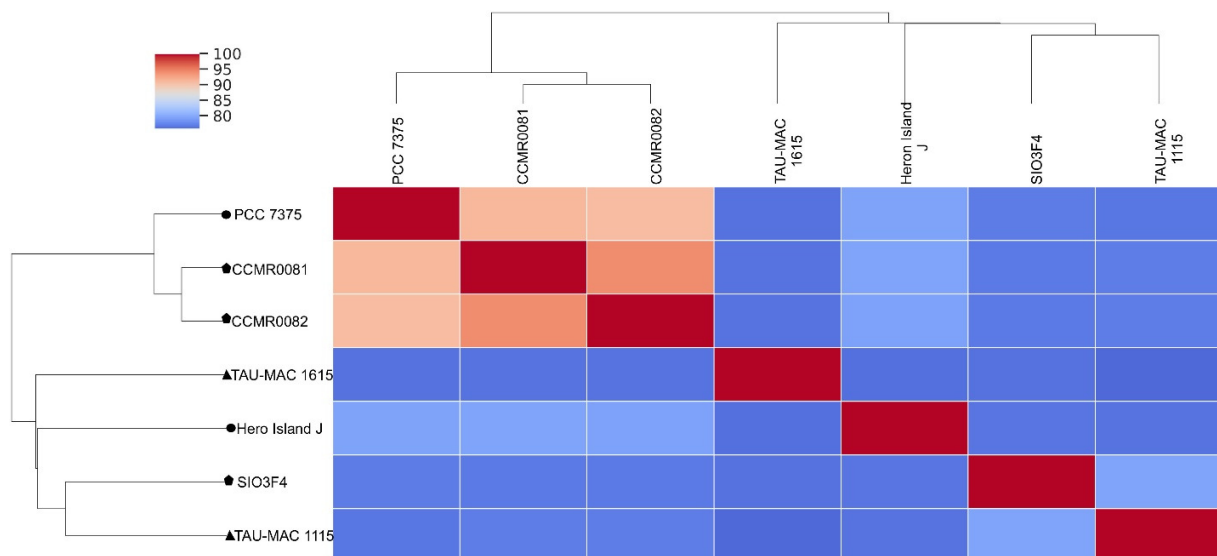

**Figure S2.** Average amino acid identity heatmap of *Leptothoe* genomes.



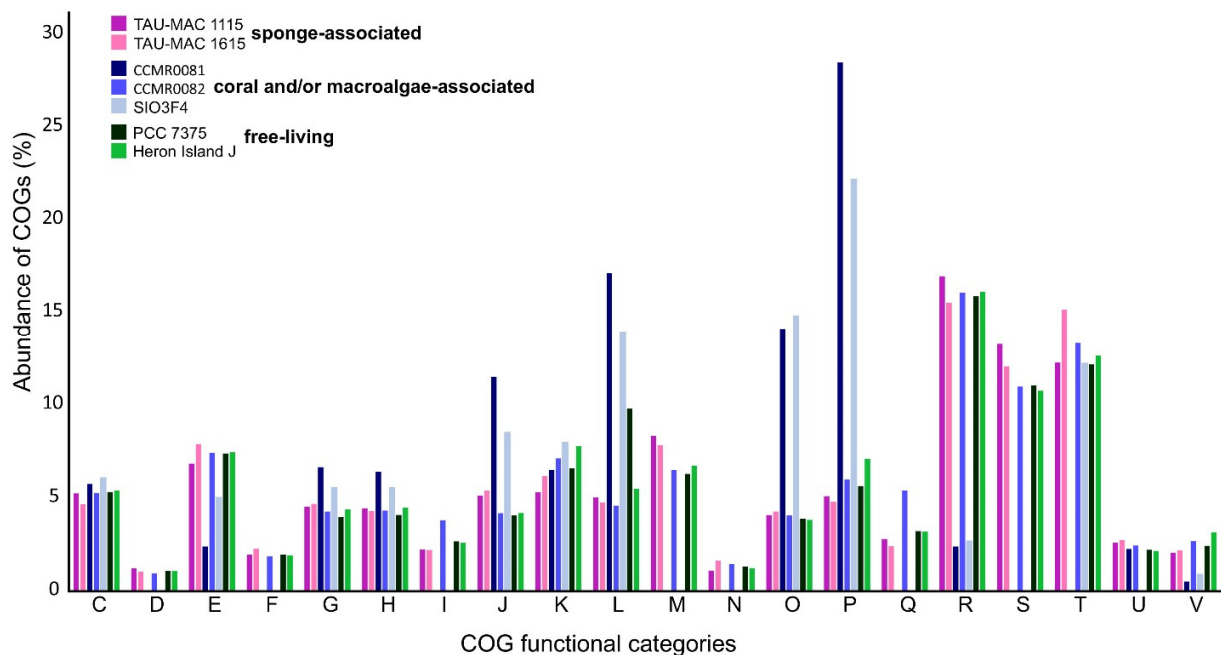

**Figure S3.** Distribution of the categories of functional genes present in seven *Leptothoe* strains based on the Cluster of Orthologous Groups (COGs) of proteins. The alphabetic code for the COG categories is as follows: C, energy production and conversion; D, cell cycle control, cell division, chromosome partitioning; E, amino acid transport and metabolism; F, nucleotide transport and metabolism; G, carbohydrate transport and metabolism; H, coenzyme transport and metabolism; I, lipid transport and metabolism; J, translation, ribosomal structure, and biogenesis; K, transcription; L, replication, recombination, and repair; M, cell wall/membrane/envelope biogenesis; N, cell motility; O, posttranslational modification, protein turnover, chaperones; P, inorganic ion transport and metabolism; Q, secondary metabolite biosynthesis, transport, and catabolism; R, general function prediction only; S, function unknown; T, signal transduction mechanisms; U, intracellular trafficking, secretion, and vesicular transport; V, defense mechanisms.
